# Supplementary material for: Revealing the Interaction Mechanism between Mycobacterium tuberculosis GyrB and Novobiocin, SPR719 through Binding Thermodynamics and Dissociation Kinetics Analysis
Source: MDPI journal article supplement (doi:10.3390/ijms25073764), 2024-03-28
Supplement: s1 [file s1]

## **Supplementary Material**

### **Revealing the Interaction Mechanism between Mycobacterium tuberculosis GyrB and Novobiocin, SPR719 through binding Thermodynamics and Dissociation Kinetics analysis**

Xiaofei Qiu<sup>1,#</sup>, Qianqian Zhang<sup>2,#</sup>, Zhaoguo Li<sup>1</sup>, Juan Zhang<sup>1</sup>, Huanxiang Liu<sup>2\*</sup>

<sup>1</sup>School of Pharmacy, Lanzhou University, Lanzhou 730000, China

<sup>2</sup>Faculty of Applied Science, Macao Polytechnic University, Macao, SAR, China

# These authors contributed equally.

\* Corresponding author

Tel.: +853-8599-6874

E-mail address: hxliu@mpu.edu.mo

**Table S1.** Cluster analysis of conformations in the two systems.

| Systems         | Populations (%) |             |             |
|-----------------|-----------------|-------------|-------------|
|                 | Cluster1(%)     | Cluster2(%) | Cluster3(%) |
| GyrB-novobiocin | 83.6            | 10.9        | 5.5         |
| GyrB-SPR719     | 90.0            | 9.1         | 0.9         |

**Table S2.** Statistical analysis of the number of dissociation pathways predicted by  $\tau$ -RAMD for the two compounds.

| Ligand     | magnitude of<br>random force<br>(kcal/mol) | path1 | path2 |
|------------|--------------------------------------------|-------|-------|
| Novobiocin | 25                                         | 97    | 3     |
| SPR719     | 25                                         | 98    | 2     |

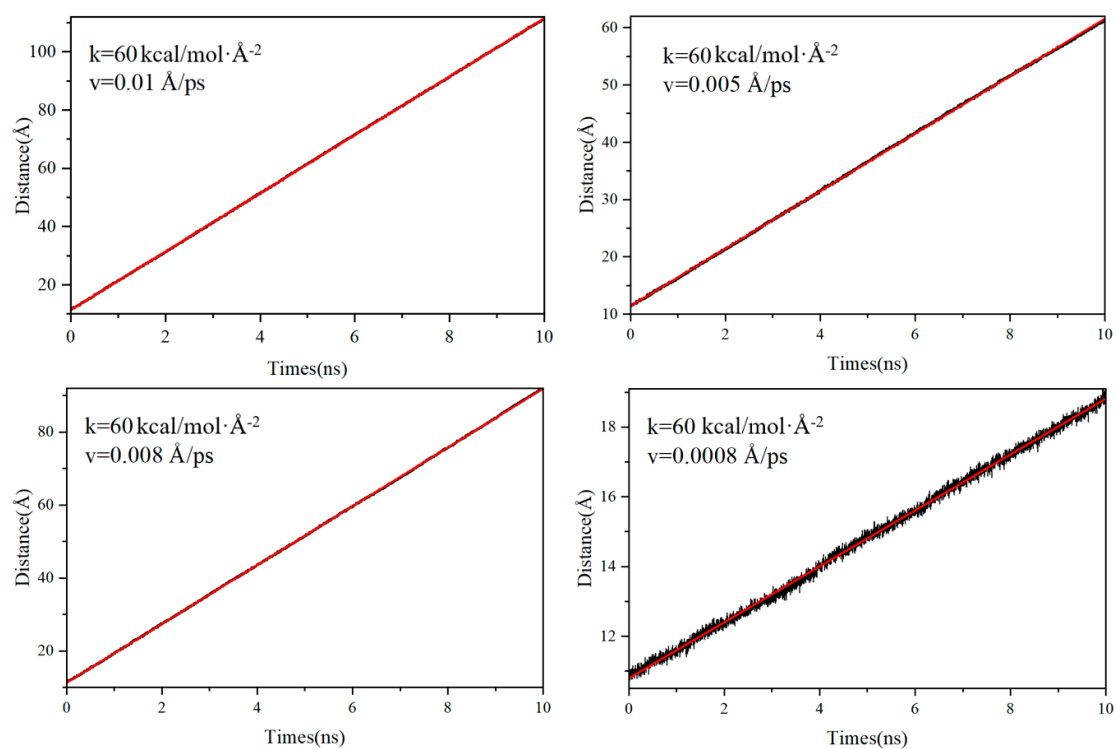

**Figure S1.** SMD parameter calibration. This figure shows the changes in reaction coordinates over time for different values of  $v$  (0.01, 0.005, 0.008, and 0.0008 Å/ps), while keeping the elastic constant  $k = 60 \text{ kcal/mol} \cdot \text{Å}^{-2}$  constant.

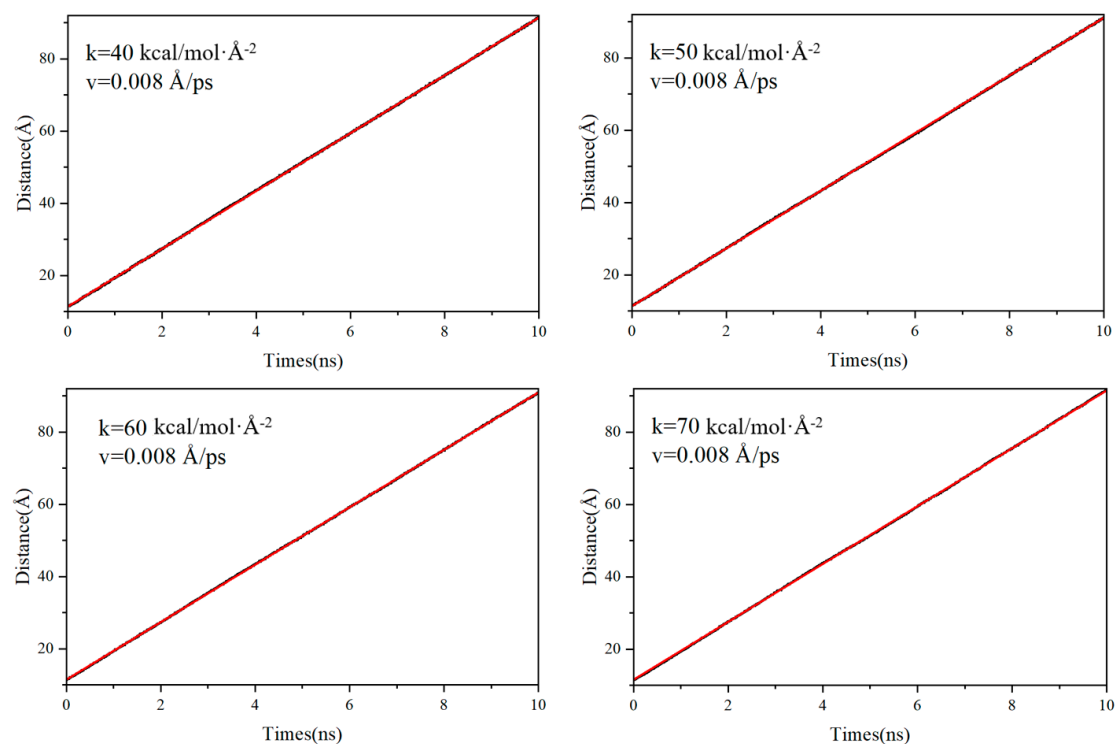

**Figure S2.** SMD parameter calibration. This figure shows the changes in reaction coordinates over time for different values of  $k$  (40, 50, 60, 70 kcal/mol·Å<sup>-2</sup>), while keeping the stretching velocities  $v = 0.008 \text{ Å/ps}$  constant.

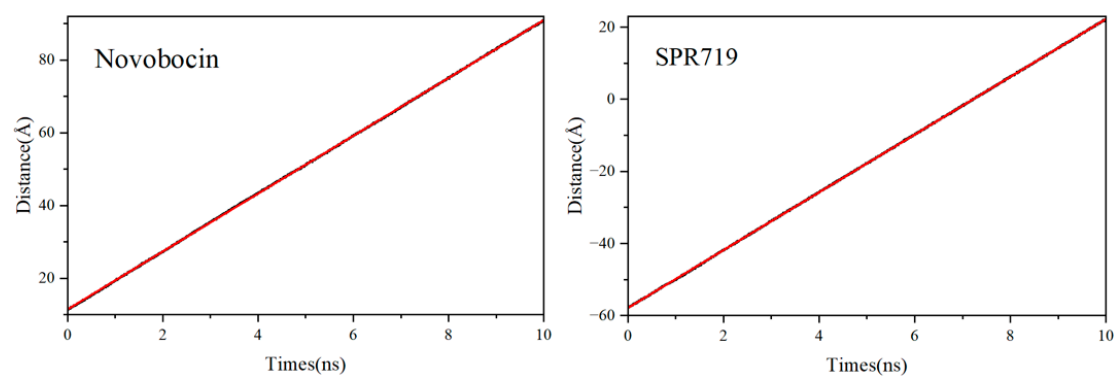

**Figure S3.** Distance between ligands and the center of the binding pocket over simulation time for the two systems with an elastic constant of  $60 \text{ kcal/mol} \cdot \text{\AA}^{-2}$  and a stretching velocity of  $v = 0.008 \text{ \AA/ps}$ .
